# Supplementary material
Source: PubMed Central journal article supplement (PMC5940540)
Supplement: NIHMS946536-supplement-supplement_1.pdf [file NIHMS946536-supplement-supplement_1.pdf]

**Supplementary Materials for**

**Behavioral Adjustment Moderates the Link between Neuroticism and  
Biological Health Risk: A U.S.-Japan Comparison Study**

Table S1.

*Regression coefficients in predicting each of the four biomarkers as a function of the interaction between (A) neuroticism and behavioral adjustment and (B) neuroticism and culture*

| <b>A. Neuroticism x Behavioral Adjustment</b> | <i>N</i> | Model 1  |             |          | Model 2  |             |          | Model 3  |             |          |
|-----------------------------------------------|----------|----------|-------------|----------|----------|-------------|----------|----------|-------------|----------|
|                                               |          | <i>B</i> | <i>SE B</i> | <i>P</i> | <i>B</i> | <i>SE B</i> | <i>P</i> | <i>B</i> | <i>SE B</i> | <i>P</i> |
| Interleukin-6                                 | 1285     | -0.04    | 0.02        | 0.082    | -0.01    | 0.01        | 0.229    | -0.01    | 0.02        | 0.413    |
| C-reactive protein                            | 1282     | -0.09    | 0.03        | 0.005    | -0.09    | 0.03        | 0.006    | -0.05    | 0.03        | 0.034    |
| Systolic blood pressure                       | 1290     | -0.01    | < 0.01      | 0.043    | -0.01    | < 0.01      | 0.083    | < 0.01   | < 0.01      | 0.262    |
| Total/HDL cholesterol                         | 1284     | -0.02    | 0.01        | 0.077    | -0.02    | 0.01        | 0.071    | -0.01    | 0.01        | 0.160    |
| <b>B. Neuroticism x Culture</b>               |          | Model 1  |             |          | Model 2  |             |          | Model 3  |             |          |
|                                               |          | <i>B</i> | <i>SE B</i> | <i>P</i> | <i>B</i> | <i>SE B</i> | <i>P</i> | <i>B</i> | <i>SE B</i> | <i>P</i> |
| Interleukin-6                                 | 1291     | -0.06    | 0.04        | 0.113    | -0.03    | 0.03        | 0.375    | -0.02    | 0.03        | 0.529    |
| C-reactive protein                            | 1288     | -0.09    | 0.05        | 0.095    | -0.06    | 0.05        | 0.243    | -0.04    | 0.05        | 0.336    |
| Systolic blood pressure                       | 1297     | -0.02    | 0.01        | 0.018    | -0.01    | 0.01        | 0.044    | -0.01    | 0.01        | 0.061    |
| Total/HDL cholesterol                         | 1290     | -0.01    | 0.02        | 0.439    | -0.03    | 0.02        | 0.068    | -0.02    | 0.01        | 0.087    |

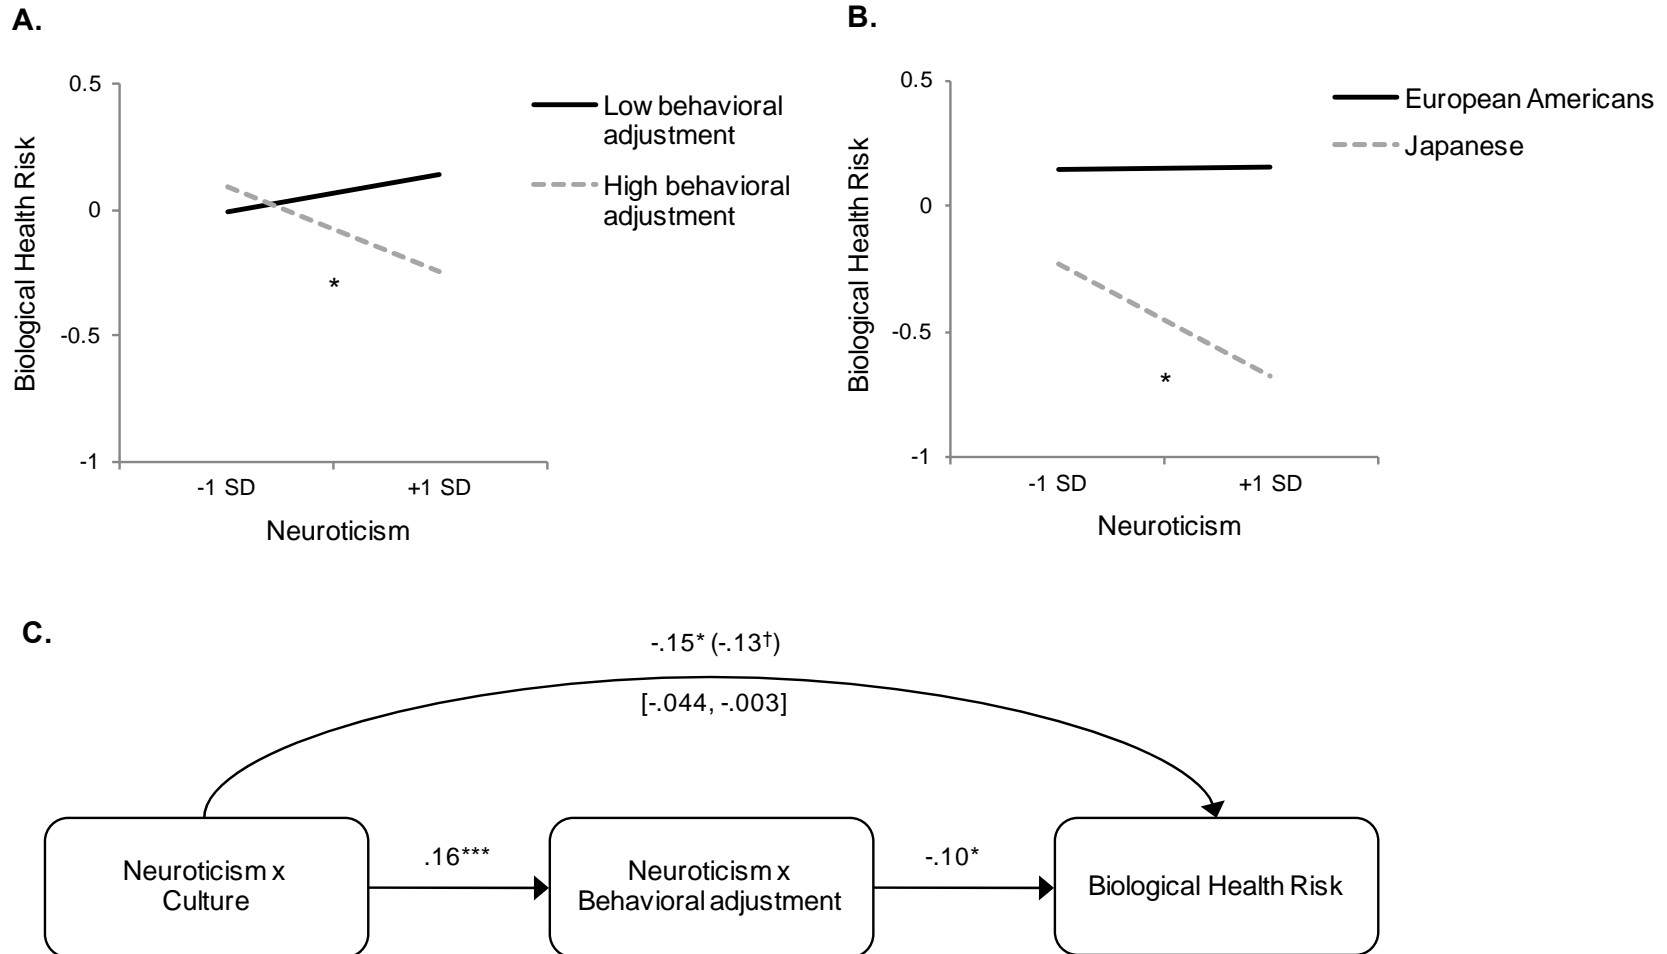

*Figure S1.* The relationship between neuroticism and biological health risk (defined by inflammation and cardiovascular malfunction). (A) Neuroticism x Behavioral adjustment interaction. (B) Neuroticism x Culture interaction. (C) Mediation analysis demonstrating that the Neuroticism x Culture interaction effect on biological health risk is mediated by the Neuroticism x Behavioral adjustment interaction. Neuroticism was assessed with three items, worrying, nervous, and irritable. Demographic variables, health conditions, and health behaviors are controlled. † $p \leq .10$ , \* $p \leq .05$ , \*\*\* $p \leq .001$ .

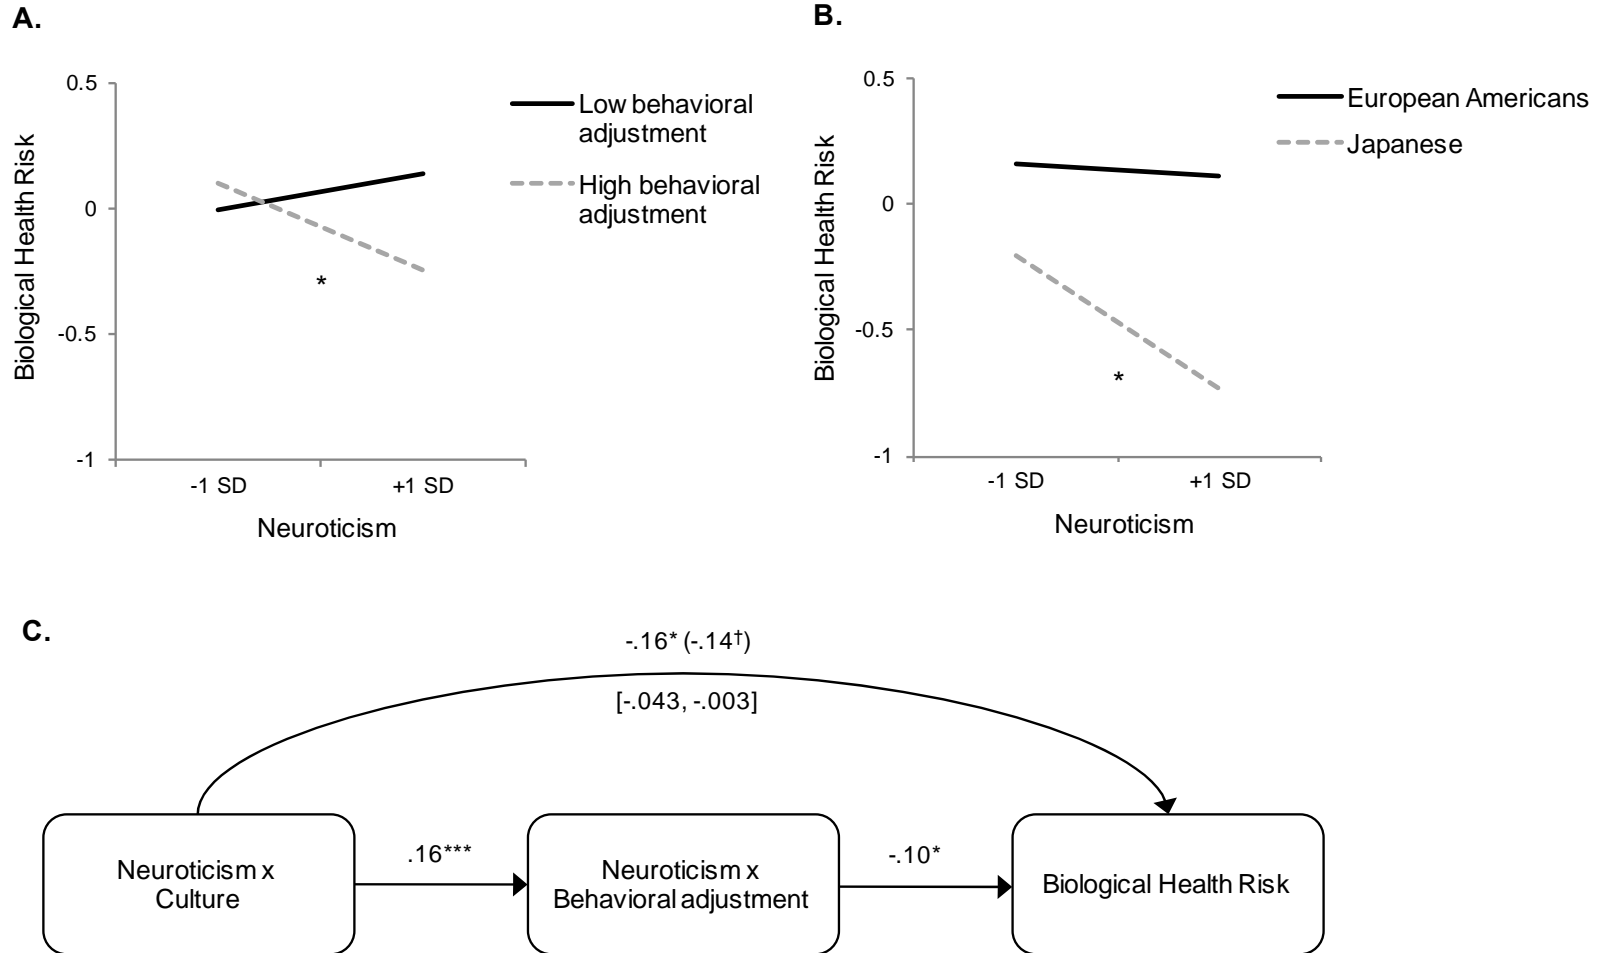

*Figure S2.* The relationship between neuroticism and biological health risk (defined by inflammation and cardiovascular malfunction). (A) Neuroticism x Behavioral adjustment interaction. (B) Neuroticism x Culture interaction. (C) Mediation analysis demonstrating that the Neuroticism x Culture interaction effect on biological health risk is mediated by the Neuroticism x Behavioral adjustment interaction. Demographic variables, health conditions, health behaviors, negative affect, and anger expression are controlled. † $p \leq .10$ , \* $p \leq .05$ , \*\*\* $p \leq .001$ .

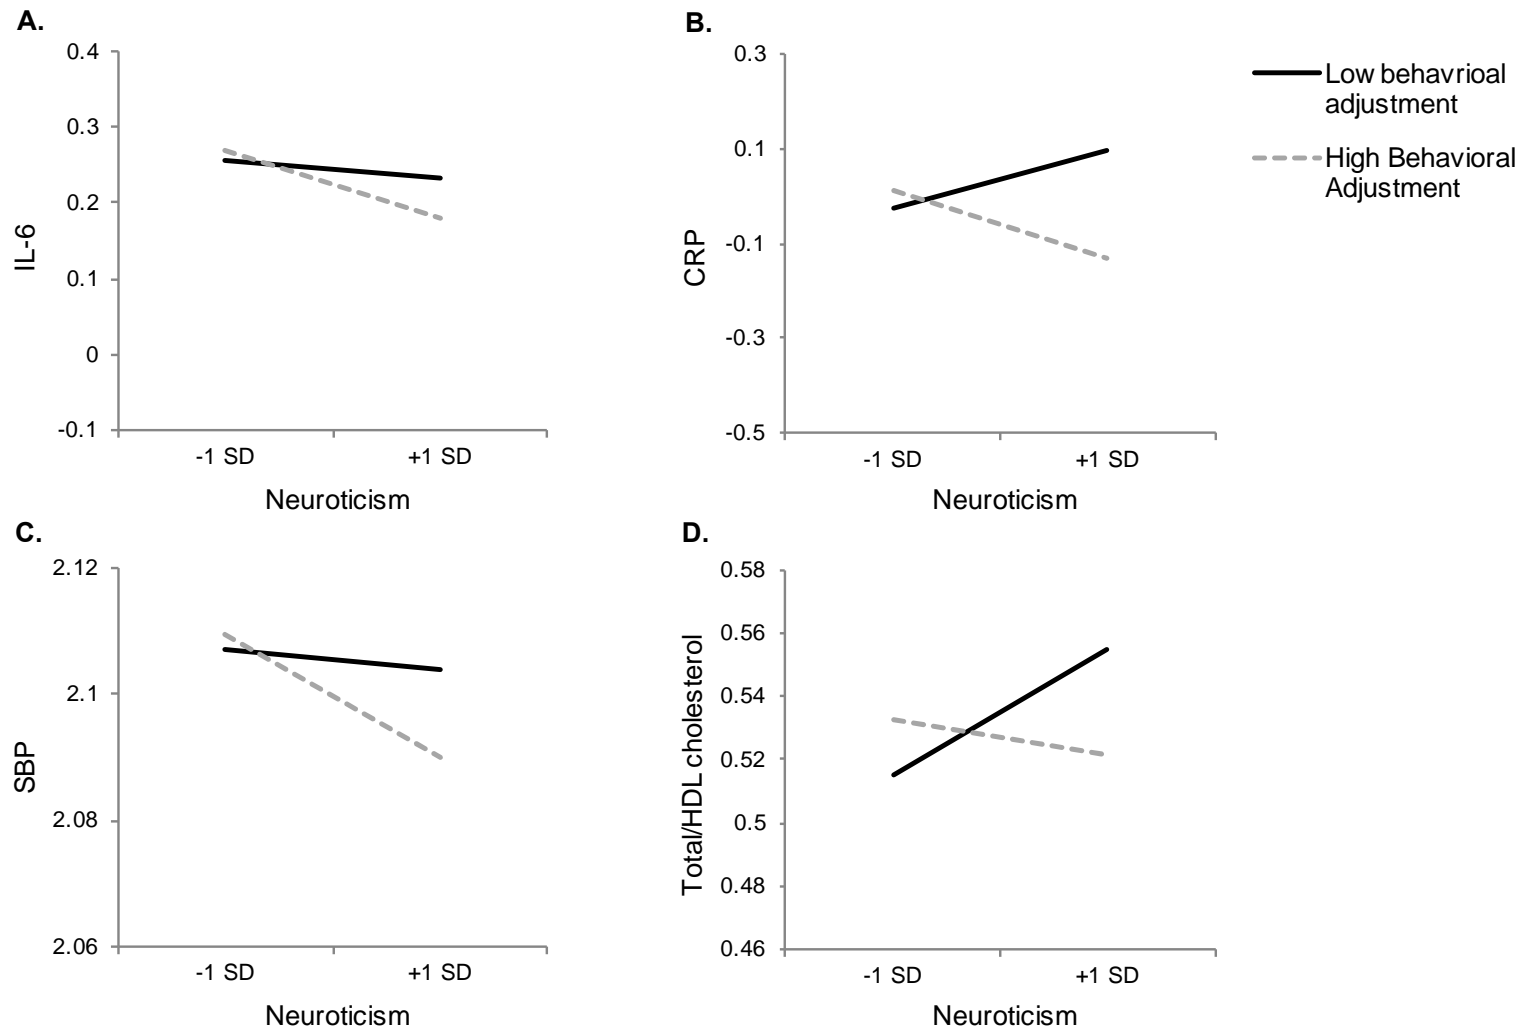

*Figure S3.* Each of the four biomarkers (IL-6, CRP, SBP and Total/HDL cholesterol) constituting the measure of biological health risk as a function of high (versus low) behavioral adjustment. Demographic variables, health behaviors, and health status are controlled.

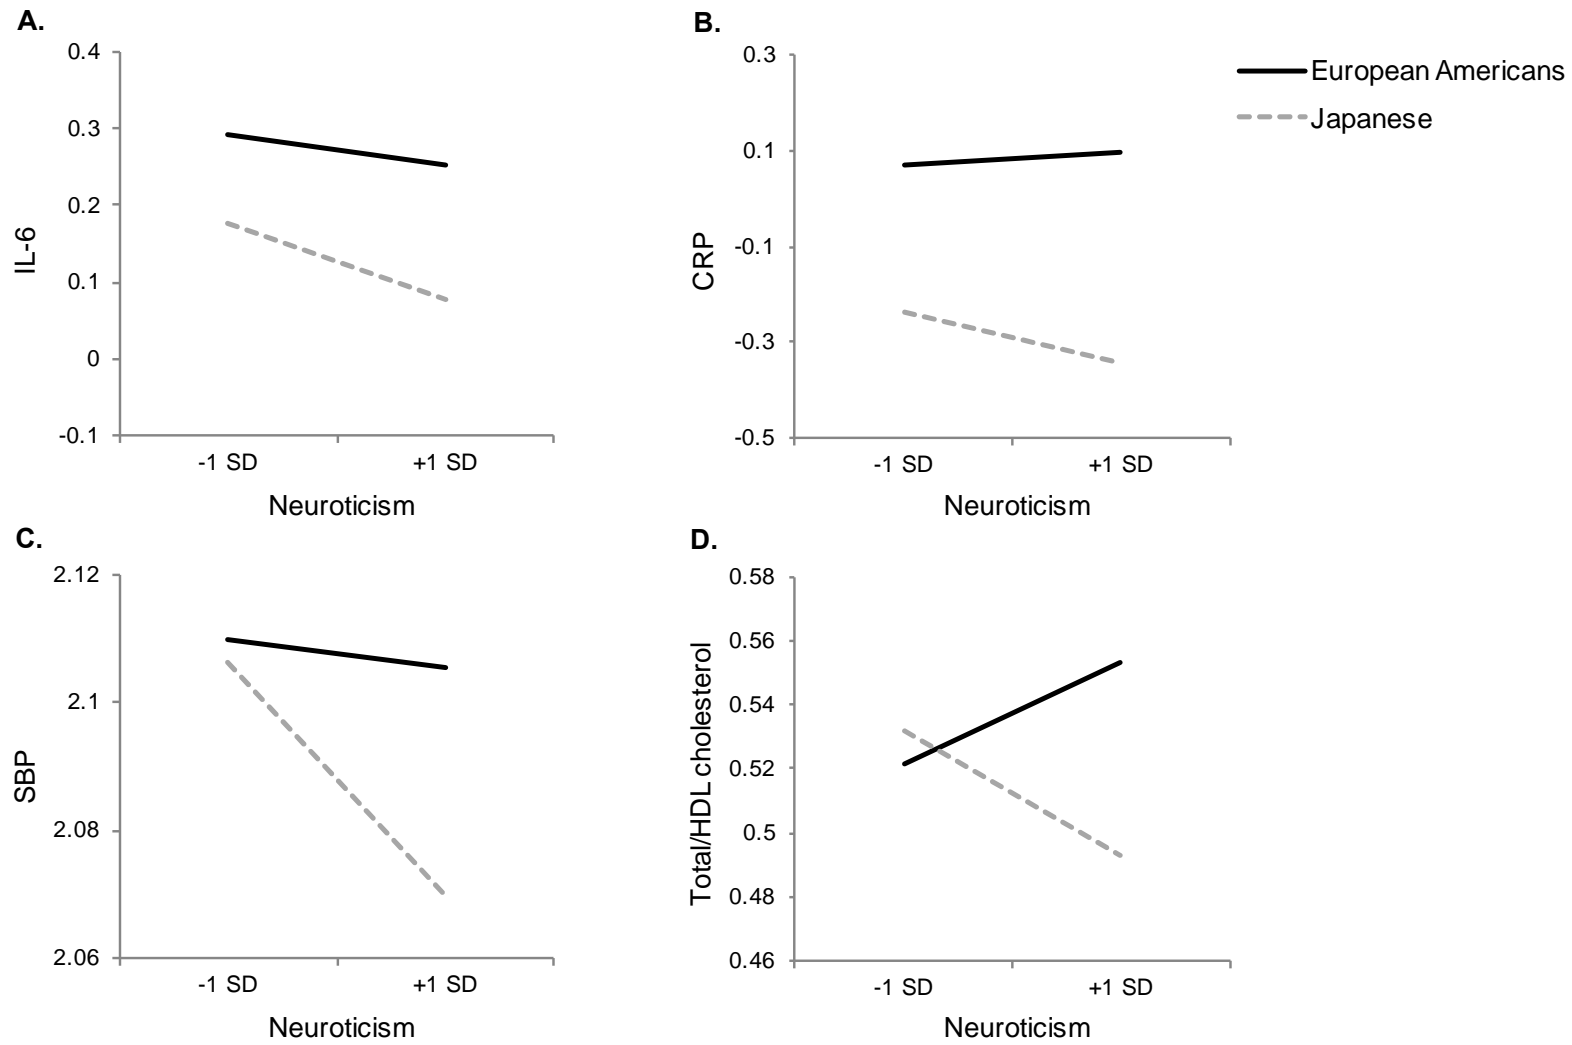

*Figure S4.* Each of the four biomarkers (IL-6, CRP, SBP and Total/HDL cholesterol) constituting the measure of biological health risk (BHR) as a function of neuroticism for European Americans (solid line) and Japanese (dotted line). Demographic variables, health behaviors, and health status are controlled.
